# Supplementary material for: Fast and sensitive multiple alignment of large genomic sequences
Source: Springer Nature journal article supplement (doi:10.1186/1471-2105-4-66), 2003-12-23

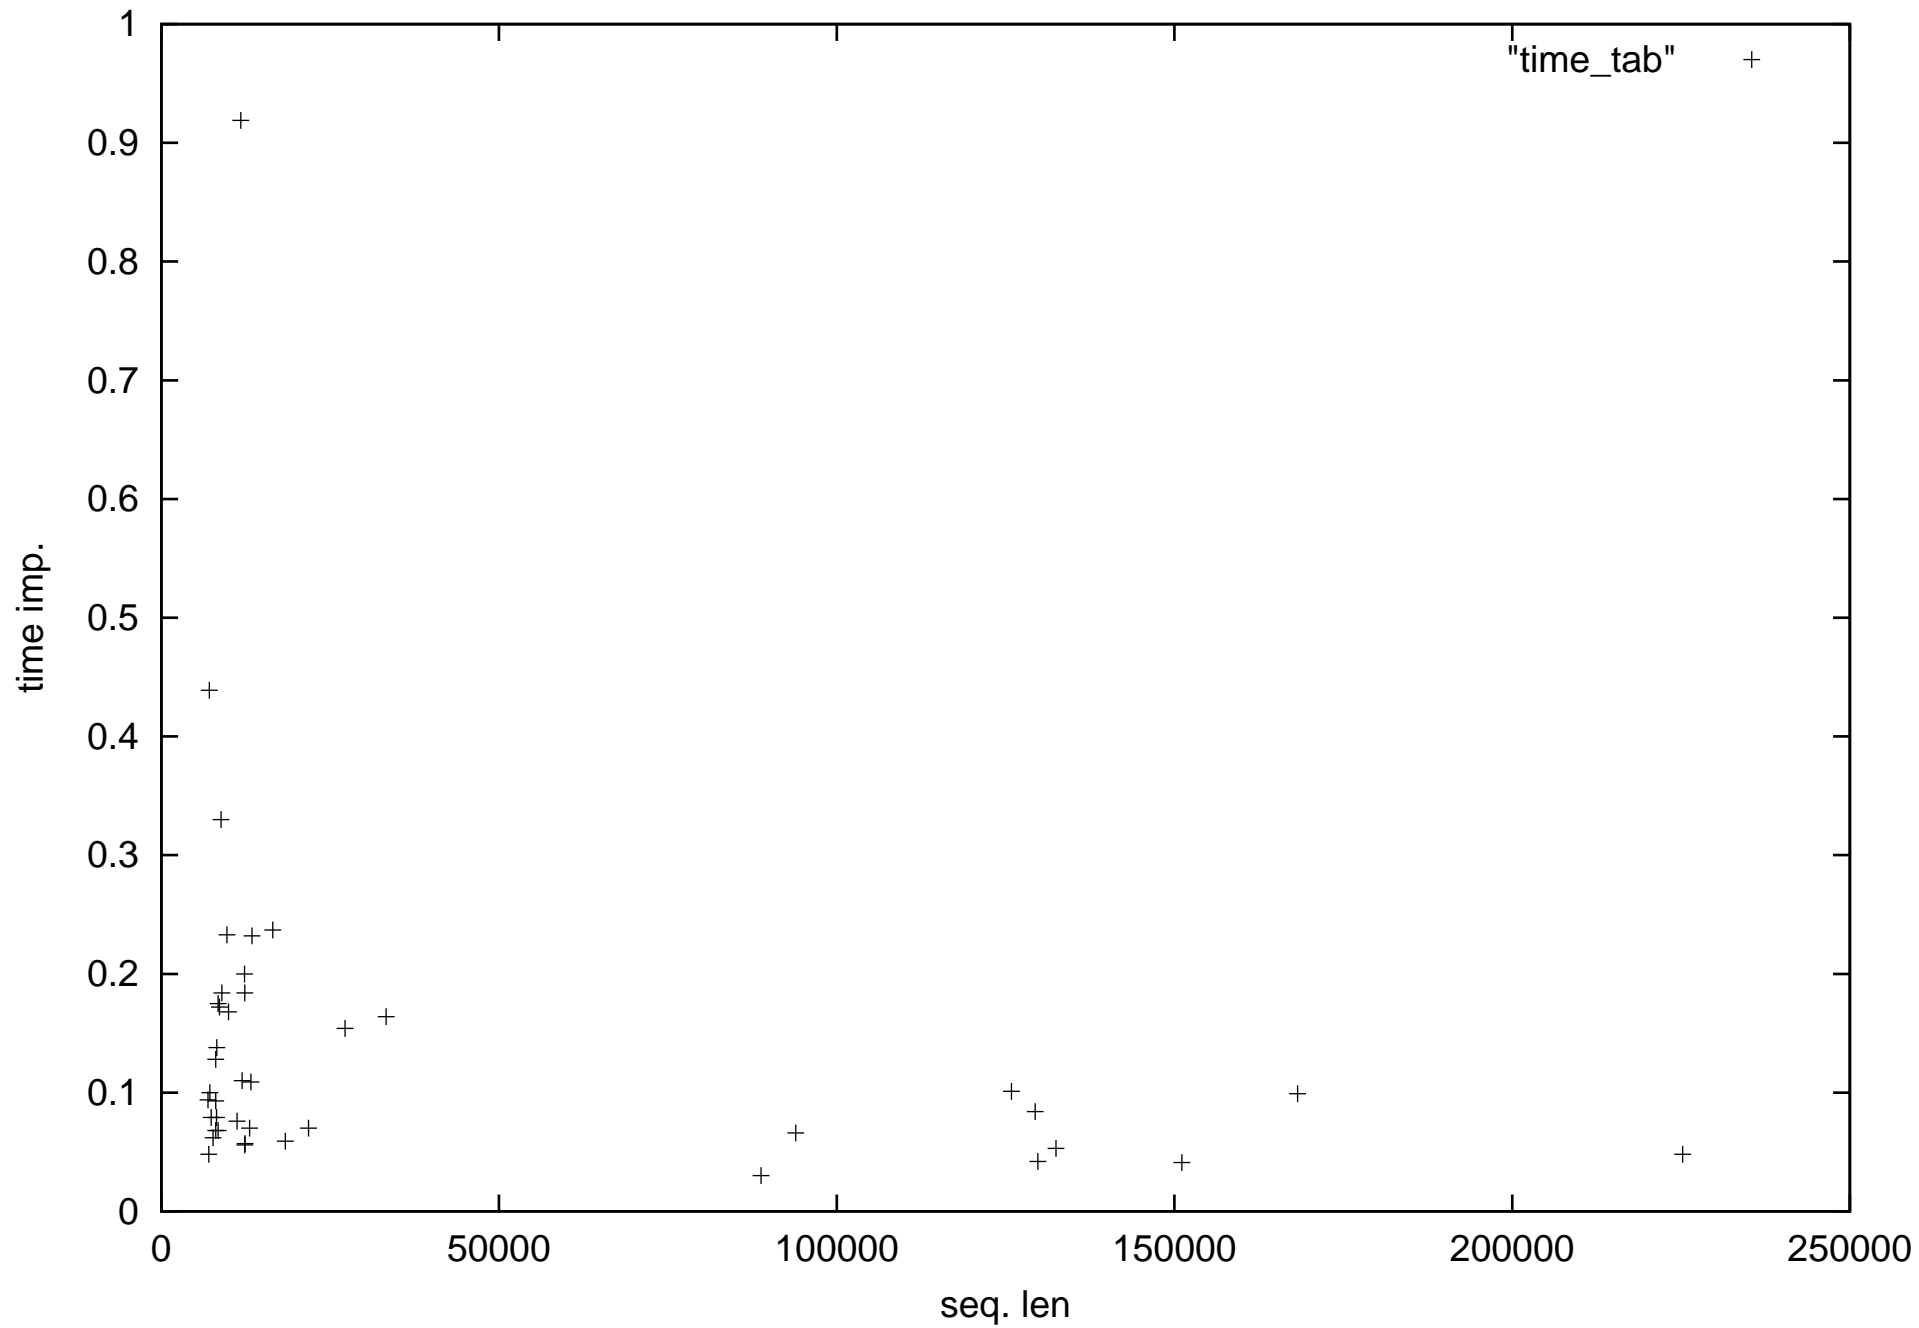

Supplement: 12859_2003_116_MOESM3_ESM.pdf [file 12859_2003_116_MOESM3_ESM.pdf]
